# Supplementary material
Source: HighWire-hosted journal article supplement (https://gut.bmj.com/content/72/2/392)
Supplement: inline-supplementary-material-4 [file inline-supplementary-material-4.xlsx]

## Sheet: Main1
	input					output
pat	Plin2MonocytesMFI	DIABETES(NO=0,YES=1)	TGmgdl	ALT(UIL)	Waist Circunference(cm)	Presence of NASH
1	2	0	167	14	100	0
2	1.4	0	88	17	155	0
3	1.7	0	78	17	110	0
4	2.1	0	141	11	131	0
5	2	0	120	22	140	0
6	1.7	0	60	11	129	0
7	1.1	1	309	34	98	0
8	1.3	0	314	11	154	0
9	1.5	1	201	24	127	0
10	1.3	0	62	9	96	0
11	1.6	0	85	10	98	0
12	1.9	0	114	35	157	0
13	1.7	1	126	32	150	0
14	2.1	0	122	13	119	0
15	1.1	0	73	15	160	0
16	2.3	0	123	19	138	0
17	1.9	0	239	27	132	0
18	4.6	0	86	44	114	1
19	1.3	0	101	16	150	0
20	1.4	0	114	16	125	0
21	1.4	0	100	12	110	0
22	1.6	0	116	37	150	0
23	2.6	0	57	5	119	0
24	1.6	0	127	23	115	0
25	1.1	0	100	25	123	0
26	1.7	0	77	20	108	0
27	1.5	0	95	14	121	0
28	1.4	0	87	15	115	0
29	1.2	0	79	10	94	0
30	2	0	57	13	109	0
31	1.8	0	79	12	99	0
32	2	0	62	9	96	0
33	2.2	0	113	29	107	0
34	1.5	0	111	10	123	0
35	1.1	0	55	12	123	0
36	3.4	0	95	11	130	1
37	2.2	0	194	16	128	0
38	3.6	0	136	13	127	1
39	3.6	0	171	16	117	1
40	2.9	1	235	64	115	1
41	4.6	0	59	34	131	1
42	3.2	1	55	28	123	1
43	2.3	1	130	26	139	1
44	2.3	0	87	27	111	0
45	2.8	1	98	16	114	1
46	2.5	1	146	45	101	1
47	3.2	1	256	56	137	1
48	2.7	1	111	21	146	1
49	2.7	0	143	19	116	0
50	2.2	1	181	25	154	1
51	5.7	1	226	27	130	1
52	3.7	0	61	20	104	1
53	3.1	0	60	15	122	1
54	2.6	0	140	21	127	0
55	4.6	0	135	17	136	1
56	3.4	1	181	31	120	1
57	5.1	0	99	48	148	1
58	4.8	0	120	23	139	1
59	4.4	1	141	23	132	1
60	5.3	0	195	26	155	1
61	3.8	1	177	29	125	1
62	6.1	0	151	33	133	1
63	3.9	1	227	62	152	1
64	4	1	124	47	150	1
65	3.6	1	85	43	114	1
66	3.9	0	190	18	123	1
67	3.3	0	346	41	111	1
68	3.6	1	117	17	120	1
69	2.8	1	100	24	111	1
70	5	1	65	19	135	1
71	4.9	1	188	22	128	1
72	5	1	194	55	143	1
73	3.4	0	167	16	162	1
74	4.8	0	96	32	137	1
75	5.2	1	97	37	123	1
76	4.7	1	181	60	133	1
77	5	1	270	99	152	1
78	4.8	0	208	101	123	1
79	5.7	0	208	11	121	1
80	4.9	1	269	33	118	1
81	4.8	0	90	66	129	1
82	5.3	0	184	75	130	1
83	3.8	0	196	41	150	1
84	4.1	0	186	21	122	1
85	3.1	0	126	50	136	1
86	5.4	0	156	33	139	1
87	6	1	239	43	110	1
88	5.5	1	66	70	140	1
89	12	1	127	30	151	1
90	4	1	125	41	130	1
91	9.7	1	129	43	112	1
92	5.6	0	189	28	155	1
93	4.7	1	179	46	155	1
94	4.6	0	176	7	149	1
95	5.7	0	134	17	160	1
96	6.3	0	290	97	160	1
97	7	0	110	43	152	1
98	6.6	1	188	53	136	1
99	5.2	1	189	49	149	1
100	7.3	0	92	57	143	1
101	0.9	0	62	17	80.8	0
102	0.7	0	152	18	93.07	0
103	0.7	0	92	23	87.25	0
104	0.6	0	114	15	81.11	0
105	1.3	0	135	19	86.97	0
106	0.9	0	124	10	87.5	0
107	1	0	110	10	87.88	0
108	0.9	0	121	16	90.8	0
109	1.6	0	78	24	78.91	0
110	1	0	62	17	74	0
111	0.6	0	135	18	80	0
112	0.9	0	92	23	83	0
113	0.8	0	114	17	75	0
114	1.1	0	135	19	97	0
115	0.8	0	124	16	72	0
116	1	0	110	16	97	0
117	1.3	0	121	16	98	0
118	1.4	0	75	17	73	0
119	1.8	0	60	19	80	0
120	1.1	0	96	24	83	0
121	2	0	76	20	90.95	0
122	1	0	63	11	85.14	0
123	1.1	0	102	11	80	0
124	0.9	0	86	12	91	0
125	1.3	0	90	13	93	0
126	1.03	0	85	12	80	0
127	1.17	0	96	11	82	0
128	1	0	81	12	79	0
129	1.9	0	93	13	81	0
130	1.7	0	88	11	94	0
131	1.2	0	92	12	86	0
132	1.4	0	93	12	82	0
133	1.7	0	80	31	81	0
134	1.4	0	44	36	79	0
135	1.9	0	92	16	83	0
136	1.6	0	67	12	72	0
137	2	0	99	8	80	0
138	1.7	0	76	18	70	0
139	2	0	100	14	84	0
140	1.3	0	54	10	82	0
141	1.6	0	24	24	85	0
142	1.7	0	68	18	78	0
143	1.6	0	73	15	83	0
144	1.6	0	94	22	74	0
145	1.6	0	55	28	64	0
146	1.5	0	69	23	72	0
147	1.6	0	72	15	69	0
148	1.7	0	67	17	77	0
149	1.4	0	87	12	71	0
150	1.6	0	72	20	83	0
151	2	0	121	51	139	0
152	2	1	183	26	113	1
153	2.1	1	47	21	120	1
154	2.9	1	144	9	134	1
155	2.2	1	100	27	131	1
156	4.6	1	130	24	168	1
157	2.7	1	87	24	155	1
158	3.1	1	93	20	112	1
159	3.4	0	120	61	146	1
160	3.6	0	48	10	120	1
161	2.1	0	165	39	139	0
162	1.9	1	83	44	116.5	1
163	2.9	0	166	23	95	1
164	3	0	227	17	126	0
165	2.5	0	73	29	141	1
166	1.7	1	207	28	119	0
167	1.6	0	192	34	137	0
168	2.8	0	160	36	125	1
169	3.3	1	93	107	118	1
170	1.6	0	83	16	137.5	0
171	2	1	65	15	119	1
172	1.2	0	77	18	121	0
173	4.4	1	209	19	118	1
174	1.6	0	85	21	147	0
175	3.8	0	247	22	132	1
176	1.3	0	152	17	137	0
177	1.8	1	201	46	140	1
178	3.1	0	96	15	155	0
179	2.8	0	114	33	122	1
180	3.1	0	129	37	157.49	1
181	2.6	0	168	34	124	1
182	2.7	0	101	27	103	1
183	2.9	0	147	24	116	1
184	2.5	0	160	20	127	0
185	2.7	1	124	25	126.55	1
186	3	0	154	17	116	1
187	1.3	1	40	43	117	0
188	2.6	1	109	61	120	1
189	4.2	1	218	27	144	1
190	4.4	1	106	27	132	1
191	3.2	1	111	16	120	1
192	2.9	1	102	55	121	1
193	4.4	0	90	31	145	1
194	3.3	0	163	20	130	1
195	3.4	0	114	75	113	1
196	3.4	1	114	75	113	1
197	5.4	0	162	32	128	1
198	4.3	0	207	36	109	1
199	4.8	0	102	35	138	1
200	3.5	0	121	23	165	1
201	5	1	131	23	135	1
202	4.4	1	95	63	119	1
203	4.2	1	221	61	139	1
204	4.6	1	274	29	132	1
205	4.2	0	266	55	160	1
206	3.8	0	97	19	122	1
207	3.5	0	328	51	137.5	1
208	3.8	0	112	38	116.5	1
209	3.8	1	231	24	136	1
210	3.8	1	102	53	132	1
211	7.3	0	510	34	140	1
212	3.1	1	126	38	130	1
213	3.1	0	76	33	116.5	1
214	4.6	0	132	34	140	1
215	5	1	134	46	130	1
216	6.4	0	167	32	127	1
217	8.4	0	139	28	150	1
218	5.1	1	170	19	143	1
219	4.6	0	200	26	150	1
220	3.8	1	244	63	138	1
221	4.4	0	41	38	135	1
222	3.6	0	144	32	126	1
223	4.2	0	137	21	155	1
224	3.7	1	102	28	142	1
225	3.8	0	118	51	147.08	1
226	4.6	0	160	41	133.55	1
227	3.6	0	152	18	130	1
228	3.7	1	131	23	126	1
229	4	0	160	43	116	1
230	3.1	1	182	16	126	1
231	4.3	0	162	41	115	1
232	4.8	0	164	25	124	1
233	4.2	0	368	25	116.92	1
234	4	0	324	66	105	1
235	6	0	250	22	101	1
236	6.6	0	178	25	121	1
237	6.7	0		31	129	#NUM!
238	8.7	0	130	21	128.5	1
239	8	0	55	34	152	1
240	9.1	0	158	60	104	1
241	8.5	1	200	46	140.39	1
242	7	0	205	38	127	1
243	7	0	76	44	148.06	1
244	6.6	1	91	24	113	1
245	7.9	0	150	40	120	1
246	6.4	0	322	36	106	1
247	6	1	179	46	155	1
248	7.2	0	102	46	162	1
249	10	0	244	122	138	1
250	12	1	228	81	118	1

## Sheet: Formula1
weights								Sigmoid(h)			sum output 1					NASH Prediction		NASH
						training	Pat	S(h1)	S(h2)	S(h3)	Wh1o1*S(h1)	Wh2o1*S(h2)	Wh3o1*S(h3)	b2o1 + sum(whjo1*S(hj))	Pat
1	-0.321235	b1		h	1	1	1	0.290493	0.67144	0.671448	1.16601	-2.03226	-2.03205	-2.49155	1	0.0764526	NO NASH	0
2	2.966	i	1	h	1	1	2	0.13023	0.834125	0.834099	0.522732	-2.52466	-2.52429	-4.11948	2	0.0159931	NO NASH	0
3	0.936371	i	2	h	1	1	3	0.26432	0.716028	0.715985	1.06095	-2.16722	-2.16684	-2.86635	3	0.0538422	NO NASH	0
4	-0.315644	i	3	h	1	1	4	0.244375	0.71085	0.710831	0.980895	-2.15155	-2.15124	-2.91514	4	0.0514102	NO NASH	0
5	0.946272	i	4	h	1	1	5	0.350377	0.645984	0.645943	1.40638	-1.95521	-1.95486	-2.09695	5	0.109394	NO NASH	0
6	-0.762063	i	5	h	1	1	6	0.186309	0.77904	0.778985	0.747828	-2.35794	-2.3575	-3.56086	6	0.0276294	NO NASH	0
7	0.289067	b1		h	2	1	7	0.255591	0.658971	0.659118	1.02592	-1.99452	-1.99473	-2.55659	7	0.0719851	NO NASH	0
8	-2.33454	i	1	h	2	1	8	0.0508232	0.903599	0.903627	0.203999	-2.73494	-2.73471	-4.8589	8	0.00769924	NO NASH	0
9	-0.975051	i	2	h	2	1	9	0.368074	0.563554	0.563642	1.47741	-1.70572	-1.70579	-1.52735	9	0.178382	NO NASH	0
10	0.143829	i	3	h	2	1	10	0.0957886	0.861366	0.861348	0.384486	-2.60712	-2.60676	-4.42264	10	0.0118602	NO NASH	0
11	-0.622314	i	4	h	2	1	11	0.161831	0.791659	0.791641	0.649575	-2.39613	-2.3958	-3.73561	11	0.0233026	NO NASH	0
12	0.64059	i	5	h	2	1	12	0.400999	0.622053	0.621999	1.60957	-1.88278	-1.8824	-1.74886	12	0.148191	NO NASH	0
13	0.2887	b1		h	3	1	13	0.530846	0.45607	0.456094	2.13077	-1.3804	-1.38031	-0.223193	13	0.444432	NO NASH	0
14	-2.33487	i	1	h	3	1	14	0.299042	0.671106	0.671078	1.20032	-2.03125	-2.03093	-2.45511	14	0.0790656	NO NASH	0
15	-0.974809	i	2	h	3	1	15	0.0631	0.904607	0.904592	0.253277	-2.738	-2.73763	-4.8156	15	0.00803723	NO NASH	0
16	0.144185	i	3	h	3	1	16	0.416197	0.589215	0.589165	1.67058	-1.78339	-1.78303	-1.4891	16	0.184058	NO NASH	0
17	-0.622362	i	4	h	3	1	17	0.32118	0.658166	0.658186	1.28918	-1.99209	-1.99191	-2.28807	17	0.092116	NO NASH	0
18	0.640359	i	5	h	3	1	18	0.941069	0.124128	0.124068	3.77736	-0.375702	-0.375475	3.43293	18	0.968718	NASH	1
19	0.406749	b2		o	1	1	19	0.100237	0.861129	0.861116	0.40234	-2.6064	-2.60606	-4.40337	19	0.0120882	NO NASH	0
20	4.0139	h	1	o	1	1	20	0.133071	0.825247	0.825241	0.534136	-2.49779	-2.49748	-4.05439	20	0.0170502	NO NASH	0
21	-3.02672	h	2	o	1	1	21	0.118416	0.836252	0.836246	0.475309	-2.5311	-2.53079	-4.17984	21	0.0150704	NO NASH	0
22	-3.02637	h	3	o	1	1	22	0.303823	0.698079	0.698045	1.21952	-2.11289	-2.11254	-2.59917	22	0.0691921	NO NASH	0
						1	23	0.292684	0.668138	0.668044	1.17481	-2.02227	-2.02175	-2.46246	23	0.078532	NO NASH	0
						1	24	0.248776	0.726483	0.726474	0.998561	-2.19886	-2.19858	-2.99213	24	0.0477826	NO NASH	0
						1	25	0.107801	0.859169	0.859166	0.432704	-2.60047	-2.60015	-4.36117	25	0.0126027	NO NASH	0
						1	26	0.299057	0.69213	0.692083	1.20039	-2.09489	-2.0945	-2.58225	26	0.0702895	NO NASH	0
						1	27	0.152715	0.806478	0.80646	0.612985	-2.44098	-2.44065	-3.8619	27	0.020595	NO NASH	0
						1	28	0.143529	0.817602	0.817585	0.576111	-2.47465	-2.47431	-3.96611	28	0.0185947	NO NASH	0
						1	29	0.079947	0.87754	0.877537	0.320899	-2.65607	-2.65575	-4.58417	29	0.010109	NO NASH	0
						1	30	0.334146	0.659579	0.659498	1.34123	-1.99636	-1.99588	-2.24427	30	0.0958451	NO NASH	0
						1	31	0.248351	0.719605	0.719567	0.996857	-2.17804	-2.17768	-2.95211	31	0.0496367	NO NASH	0
						1	32	0.275436	0.694448	0.694388	1.10557	-2.1019	-2.10147	-2.69106	32	0.0635032	NO NASH	0
						1	33	0.537565	0.506541	0.506495	2.15773	-1.53316	-1.53284	-0.50152	33	0.377184	NO NASH	0
						1	34	0.109732	0.841518	0.841511	0.440454	-2.54704	-2.54672	-4.24656	34	0.0141114	NO NASH	0
						1	35	0.0679111	0.898364	0.898345	0.272588	-2.7191	-2.71873	-4.75849	35	0.00850562	NO NASH	0
						1	36	0.606058	0.428724	0.428629	2.43266	-1.29763	-1.29719	0.244587	36	0.560844	NASH	1
						1	37	0.327532	0.643088	0.643087	1.31468	-1.94645	-1.94622	-2.17124	37	0.102363	NO NASH	0
						1	38	0.659918	0.380409	0.380343	2.64884	-1.15139	-1.15106	0.753142	38	0.679863	NASH	1
						1	39	0.700488	0.346009	0.345966	2.81169	-1.04727	-1.04702	1.12414	39	0.754757	NASH	1
						1	40	0.914454	0.126206	0.126226	3.67053	-0.381992	-0.382005	3.31328	40	0.964882	NASH	1
						1	41	0.926878	0.146965	0.146876	3.7204	-0.444821	-0.4445	3.23782	41	0.962233	NASH	1
						1	42	0.907722	0.139905	0.139863	3.64351	-0.423454	-0.423277	3.20353	42	0.960967	NASH	1
						1	43	0.70512	0.310681	0.310689	2.83028	-0.940345	-0.94026	1.35643	43	0.795178	NASH	1
						1	44	0.566929	0.488193	0.488119	2.2756	-1.47763	-1.47723	-0.272507	44	0.432292	NO NASH	0
						1	45	0.774886	0.245699	0.245689	3.11032	-0.743663	-0.743545	2.02986	45	0.883897	NASH	1
						1	46	0.863531	0.179335	0.17935	3.46613	-0.542799	-0.54278	2.7873	46	0.941986	NASH	1
						1	47	0.91486	0.123771	0.123786	3.67216	-0.374621	-0.374622	3.32967	47	0.965433	NASH	1
						1	48	0.760916	0.26316	0.263147	3.05424	-0.796514	-0.796379	1.8681	48	0.866238	NASH	1
						1	49	0.555264	0.474227	0.474185	2.22877	-1.43535	-1.43506	-0.234891	49	0.441546	NO NASH	0
						1	50	0.627213	0.364587	0.364622	2.51757	-1.10351	-1.10348	0.717336	50	0.67202	NASH	1
						1	51	0.969991	0.0520302	0.0520279	3.89345	-0.157481	-0.157456	3.98526	51	0.981752	NASH	1
						1	52	0.825946	0.256705	0.2566	3.31527	-0.776976	-0.776568	2.16847	52	0.897382	NASH	1
						1	53	0.655597	0.40825	0.408124	2.6315	-1.23566	-1.23514	0.567454	53	0.638176	NASH	1
						1	54	0.535535	0.494406	0.49436	2.14959	-1.49643	-1.49612	-0.436212	54	0.392644	NO NASH	0
						1	55	0.831173	0.234297	0.234226	3.33625	-0.709151	-0.708856	2.32499	55	0.910926	NASH	1
						1	56	0.900706	0.13407	0.134076	3.61535	-0.405792	-0.405763	3.21054	56	0.961229	NASH	1
						1	57	0.948617	0.112896	0.112836	3.80765	-0.341706	-0.341483	3.53121	57	0.971563	NASH	1
						1	58	0.883581	0.186238	0.186167	3.54661	-0.563692	-0.563412	2.82625	58	0.944078	NASH	1
						1	59	0.936645	0.0947932	0.0947823	3.7596	-0.286913	-0.286846	3.59259	59	0.973211	NASH	1
						1	60	0.900288	0.162105	0.162057	3.61367	-0.490648	-0.490443	3.03933	60	0.954319	NASH	1
						1	61	0.920402	0.112979	0.112979	3.6944	-0.341956	-0.341917	3.41728	61	0.96824	NASH	1
						1	62	0.954365	0.095001	0.0949605	3.83073	-0.287542	-0.287386	3.66255	62	0.974975	NASH	1
						1	63	0.953306	0.080683	0.0806832	3.82648	-0.244205	-0.244177	3.74484	63	0.976907	NASH	1
						1	64	0.953923	0.0820142	0.0819988	3.82895	-0.248234	-0.248159	3.73931	64	0.976781	NASH	1
						1	65	0.950824	0.0875373	0.0875183	3.81651	-0.264951	-0.264863	3.69345	65	0.975718	NASH	1
						1	66	0.755307	0.299517	0.299476	3.03173	-0.906555	-0.906325	1.6256	66	0.835565	NASH	1
						1	67	0.785773	0.278596	0.278607	3.15402	-0.843232	-0.843168	1.87437	67	0.866963	NASH	1
						1	68	0.874775	0.156069	0.156057	3.51126	-0.472379	-0.472288	2.97334	68	0.951355	NASH	1
						1	69	0.836681	0.199697	0.199687	3.35835	-0.604428	-0.604327	2.55635	69	0.927999	NASH	1
						1	70	0.957679	0.0735781	0.073548	3.84403	-0.2227	-0.222584	3.80549	70	0.978236	NASH	1
						1	71	0.948013	0.078826	0.0788223	3.80523	-0.238584	-0.238546	3.73485	71	0.97668	NASH	1
						1	72	0.976706	0.047413	0.0474078	3.9204	-0.143506	-0.143473	4.04017	72	0.98271	NASH	1
						1	73	0.608157	0.426014	0.425952	2.44108	-1.28943	-1.28909	0.269315	73	0.566925	NASH	1
						1	74	0.918397	0.151674	0.151602	3.68636	-0.459075	-0.458803	3.17523	74	0.959891	NASH	1
						1	75	0.978349	0.045592	0.045578	3.927	-0.137994	-0.137936	4.05781	75	0.983007	NASH	1
						1	76	0.976153	0.0489671	0.0489621	3.91818	-0.14821	-0.148178	4.02854	76	0.982511	NASH	1
						1	77	0.984347	0.0362837	0.0362823	3.95107	-0.109821	-0.109804	4.1382	77	0.984299	NASH	1
						1	78	0.96599	0.083581	0.0835569	3.87739	-0.252977	-0.252874	3.77829	78	0.977649	NASH	1
						1	79	0.854531	0.193638	0.193598	3.43	-0.586089	-0.585898	2.66477	79	0.934915	NASH	1
						1	80	0.962165	0.0623091	0.0623136	3.86204	-0.188593	-0.188584	3.89161	80	0.979996	NASH	1
						1	81	0.959767	0.0979809	0.0979276	3.85241	-0.296561	-0.296365	3.66624	81	0.975065	NASH	1
						1	82	0.966277	0.0814396	0.0814106	3.87854	-0.246495	-0.246378	3.79242	82	0.977956	NASH	1
						1	83	0.841309	0.236918	0.236871	3.37693	-0.717087	-0.71686	2.34974	83	0.912913	NASH	1
						1	84	0.807563	0.255295	0.255252	3.24148	-0.772707	-0.772487	2.10304	84	0.891198	NASH	1
						1	85	0.812455	0.280063	0.279994	3.26112	-0.847672	-0.847366	1.97283	85	0.877914	NASH	1
						1	86	0.933076	0.126029	0.125981	3.74528	-0.381454	-0.381266	3.38931	86	0.967369	NASH	1
						1	87	0.984901	0.0319592	0.0319583	3.9533	-0.0967316	-0.0967176	4.1666	87	0.984732	NASH	1
						1	88	0.990081	0.0281535	0.0281388	3.97409	-0.0852127	-0.0851583	4.21047	88	0.985378	NASH	1
						1	89	0.997132	0.00907638	0.00907156	4.00239	-0.0274717	-0.0274539	4.35421	89	0.987311	NASH	1
						1	90	0.952913	0.0815996	0.0815873	3.8249	-0.246979	-0.246913	3.73776	90	0.976746	NASH	1
						1	91	0.996932	0.00985961	0.00985562	4.00159	-0.0298423	-0.0298267	4.34867	91	0.987241	NASH	1
						1	92	0.920102	0.139218	0.139171	3.6932	-0.421375	-0.421184	3.25739	92	0.962938	NASH	1
						1	93	0.966018	0.0627032	0.0626953	3.8775	-0.189785	-0.189739	3.90473	93	0.980251	NASH	1
						1	94	0.645897	0.369258	0.369194	2.59257	-1.11764	-1.11732	0.764357	94	0.682299	NASH	1
						1	95	0.891717	0.170553	0.170482	3.57926	-0.516215	-0.51594	2.95386	95	0.950446	NASH	1
						1	96	0.978321	0.0579716	0.0579529	3.92688	-0.175464	-0.175387	3.98278	96	0.981707	NASH	1
						1	97	0.975808	0.0629688	0.0629292	3.9168	-0.190589	-0.190447	3.94251	97	0.98097	NASH	1
						1	98	0.989774	0.025037	0.025032	3.97286	-0.07578	-0.075756	4.22807	98	0.985629	NASH	1
						1	99	0.976338	0.047544	0.0475376	3.91892	-0.143902	-0.143866	4.0379	99	0.982671	NASH	1
						1	100	0.9851	0.0457278	0.0456951	3.95409	-0.138405	-0.13829	4.08415	100	0.983441	NASH	1
						0	101	0.0689831	0.898343	0.898341	0.276891	-2.71903	-2.71871	-4.75411	101	0.00854263	NO NASH	0
						0	102	0.0244943	0.950245	0.950262	0.0983176	-2.87613	-2.87584	-5.24691	102	0.00523621	NO NASH	0
						0	103	0.0375116	0.936046	0.936056	0.150568	-2.83315	-2.83285	-5.10869	103	0.00600771	NO NASH	0
						0	104	0.0160064	0.964204	0.964216	0.0642482	-2.91838	-2.91807	-5.36545	104	0.00465358	NO NASH	0
						0	105	0.153399	0.803816	0.803835	0.615729	-2.43293	-2.4327	-3.84315	105	0.0209766	NO NASH	0
						0	106	0.0327983	0.934618	0.934632	0.131649	-2.82883	-2.82854	-5.11897	106	0.00594659	NO NASH	0
						0	107	0.0457813	0.916786	0.916799	0.183762	-2.77486	-2.77457	-4.95892	107	0.00697157	NO NASH	0
						0	108	0.0492773	0.915876	0.915891	0.197794	-2.7721	-2.77183	-4.93939	108	0.00710811	NO NASH	0
						0	109	0.348873	0.654525	0.654495	1.40034	-1.98107	-1.98075	-2.15472	109	0.103891	NO NASH	0
						0	110	0.0977109	0.867227	0.867224	0.392202	-2.62486	-2.62454	-4.45044	110	0.0115387	NO NASH	0
						0	111	0.018182	0.960664	0.960679	0.072981	-2.90767	-2.90737	-5.33531	111	0.00479533	NO NASH	0
						0	112	0.0786076	0.887435	0.887445	0.315523	-2.68602	-2.68574	-4.64948	112	0.00947588	NO NASH	0
						0	113	0.0436366	0.923706	0.923724	0.175153	-2.7958	-2.79553	-5.00943	113	0.00663045	NO NASH	0
						0	114	0.0922182	0.866485	0.866502	0.370155	-2.62261	-2.62236	-4.46806	114	0.0113395	NO NASH	0
						0	115	0.0414855	0.925357	0.925378	0.166519	-2.8008	-2.80054	-5.02807	115	0.00650881	NO NASH	0
						0	116	0.0649179	0.897544	0.897554	0.260574	-2.71662	-2.71633	-4.76562	116	0.00844564	NO NASH	0
						0	117	0.127056	0.828921	0.82893	0.509992	-2.50892	-2.50865	-4.10082	117	0.0162893	NO NASH	0
						0	118	0.218461	0.752094	0.752082	0.876879	-2.27638	-2.27608	-3.26883	118	0.0366561	NO NASH	0
						0	119	0.395714	0.617855	0.617795	1.58836	-1.87008	-1.86968	-1.74465	119	0.148723	NO NASH	0
						0	120	0.137124	0.828632	0.82864	0.550401	-2.50804	-2.50777	-4.05866	120	0.0169789	NO NASH	0
						0	121	0.441594	0.579018	0.57896	1.77252	-1.75253	-1.75215	-1.32541	121	0.20992	NO NASH	0
						0	122	0.0602695	0.903758	0.903755	0.241916	-2.73543	-2.7351	-4.82186	122	0.0079875	NO NASH	0
						0	123	0.0711794	0.885604	0.885616	0.285707	-2.68048	-2.6802	-4.66822	123	0.0093016	NO NASH	0
						0	124	0.042052	0.925457	0.925464	0.168792	-2.8011	-2.8008	-5.02636	124	0.00651989	NO NASH	0
						0	125	0.120216	0.836321	0.836318	0.482534	-2.53131	-2.53101	-4.17303	125	0.0151717	NO NASH	0
						0	126	0.0676194	0.892806	0.892813	0.271418	-2.70228	-2.70198	-4.72609	126	0.00878319	NO NASH	0
						0	127	0.084292	0.870983	0.870991	0.33834	-2.63622	-2.63594	-4.52707	127	0.0106966	NO NASH	0
						0	128	0.0637617	0.897867	0.897873	0.255933	-2.7176	-2.7173	-4.77221	128	0.00839067	NO NASH	0
						0	129	0.316502	0.659572	0.659549	1.27041	-1.99634	-1.99604	-2.31522	129	0.0898701	NO NASH	0
						0	130	0.205241	0.752578	0.752557	0.823817	-2.27784	-2.27752	-3.32479	130	0.0347304	NO NASH	0
						0	131	0.0952767	0.860663	0.860667	0.382431	-2.60499	-2.6047	-4.42051	131	0.0118852	NO NASH	0
						0	132	0.146697	0.80721	0.80721	0.588826	-2.4432	-2.44292	-3.89054	132	0.020025	NO NASH	0
						0	133	0.442773	0.588696	0.588657	1.77725	-1.78182	-1.78149	-1.37932	133	0.201119	NO NASH	0
						0	134	0.38781	0.649487	0.649416	1.55663	-1.96582	-1.96537	-1.96781	134	0.122624	NO NASH	0
						0	135	0.356959	0.633263	0.633234	1.4328	-1.91671	-1.9164	-1.99356	135	0.11988	NO NASH	0
						0	136	0.238289	0.729044	0.729018	0.956468	-2.20661	-2.20628	-3.04967	136	0.0452316	NO NASH	0
						0	137	0.252099	0.699478	0.699463	1.0119	-2.11713	-2.11683	-2.81531	137	0.0565025	NO NASH	0
						0	138	0.350485	0.644741	0.644714	1.40681	-1.95145	-1.95114	-2.08903	138	0.110167	NO NASH	0
						0	139	0.354744	0.62931	0.629285	1.42391	-1.90475	-1.90445	-1.97854	139	0.121475	NO NASH	0
						0	140	0.12116	0.837571	0.837549	0.486325	-2.5351	-2.53473	-4.17676	140	0.0151162	NO NASH	0
						0	141	0.423452	0.626467	0.626334	1.6997	-1.89614	-1.89552	-1.68521	141	0.156406	NO NASH	0
						0	142	0.339782	0.656858	0.656817	1.36385	-1.98813	-1.98777	-2.2053	142	0.0992759	NO NASH	0
						0	143	0.252307	0.721984	0.721955	1.01273	-2.18524	-2.1849	-2.95066	143	0.0497052	NO NASH	0
						0	144	0.328214	0.663476	0.663465	1.31742	-2.00816	-2.00789	-2.29188	144	0.0917978	NO NASH	0
						0	145	0.448123	0.588715	0.588663	1.79872	-1.78188	-1.78151	-1.35792	145	0.204579	NO NASH	0
						0	146	0.321441	0.676953	0.676925	1.29023	-2.04895	-2.04862	-2.40059	146	0.0831276	NO NASH	0
						0	147	0.280655	0.6972	0.697177	1.12652	-2.11023	-2.10992	-2.68688	147	0.0637522	NO NASH	0
						0	148	0.330961	0.66251	0.662469	1.32844	-2.00523	-2.00488	-2.27492	148	0.0932219	NO NASH	0
						0	149	0.16384	0.790861	0.790862	0.657637	-2.39372	-2.39344	-3.72277	149	0.0235966	NO NASH	0
						0	150	0.30794	0.684236	0.684201	1.23604	-2.07099	-2.07065	-2.49885	150	0.0759388	NO NASH	0
						0	151	0.545145	0.518692	0.518638	2.18816	-1.56994	-1.56959	-0.544622	151	0.367113	NO NASH	0
						0	152	0.624137	0.364906	0.364965	2.50522	-1.10447	-1.10452	0.702984	152	0.668849	NASH	1
						0	153	0.696993	0.333558	0.333503	2.79766	-1.00959	-1.0093	1.18552	153	0.765939	NASH	1
						0	154	0.634387	0.334779	0.334792	2.54637	-1.01328	-1.0132	0.926631	154	0.716391	NASH	1
						0	155	0.7117	0.311663	0.311657	2.85669	-0.943316	-0.943188	1.37694	155	0.798499	NASH	1
						0	156	0.93747	0.095875	0.0958552	3.76291	-0.290187	-0.290093	3.58938	156	0.973127	NASH	1
						0	157	0.788412	0.247978	0.247945	3.16461	-0.750561	-0.750372	2.07042	157	0.887995	NASH	1
						0	158	0.855594	0.179899	0.179882	3.43427	-0.544503	-0.544388	2.75213	158	0.940034	NASH	1
						0	159	0.868701	0.223547	0.223475	3.48688	-0.676615	-0.676319	2.5407	159	0.926946	NASH	1
						0	160	0.6871	0.375042	0.374895	2.75795	-1.13515	-1.13457	0.894982	160	0.709917	NASH	1
						0	161	0.493509	0.543007	0.54298	1.9809	-1.64353	-1.64326	-0.899145	161	0.289226	NO NASH	0
						0	162	0.746333	0.298184	0.298175	2.99571	-0.902521	-0.902389	1.59755	162	0.831675	NASH	1
						0	163	0.672567	0.378625	0.378602	2.69962	-1.14599	-1.14579	0.814583	163	0.693085	NASH	1
						0	164	0.554862	0.459961	0.459949	2.22716	-1.39217	-1.39197	-0.15024	164	0.462511	NO NASH	0
						0	165	0.612382	0.460495	0.460384	2.45804	-1.39379	-1.39329	0.0777049	165	0.519416	NASH	1
						0	166	0.504229	0.457607	0.457691	2.02392	-1.38505	-1.38514	-0.339519	166	0.415926	NO NASH	0
						0	167	0.26911	0.712015	0.712024	1.08018	-2.15507	-2.15485	-2.82299	167	0.0560944	NO NASH	0
						0	168	0.698922	0.372438	0.372395	2.8054	-1.12727	-1.127	0.957883	168	0.722698	NASH	1
						0	169	0.971022	0.0645709	0.0645571	3.89759	-0.195438	-0.195374	3.91353	169	0.980421	NASH	1
						0	170	0.189928	0.778334	0.778296	0.762354	-2.3558	-2.35541	-3.54211	170	0.0281375	NO NASH	0
						0	171	0.568062	0.418833	0.418808	2.28014	-1.26769	-1.26747	0.151734	171	0.537861	NASH	1
						0	172	0.111929	0.853411	0.853395	0.449273	-2.58304	-2.58269	-4.30971	172	0.0132593	NO NASH	0
						0	173	0.922297	0.104071	0.104076	3.70201	-0.314995	-0.314972	3.47879	173	0.970078	NASH	1
						0	174	0.222427	0.756388	0.756344	0.892799	-2.28938	-2.28898	-3.2788	174	0.0363055	NO NASH	0
						0	175	0.750885	0.303462	0.303437	3.01398	-0.918496	-0.918312	1.58392	175	0.829759	NASH	1
						0	176	0.100005	0.856643	0.856651	0.40141	-2.59282	-2.59254	-4.37721	176	0.0124046	NO NASH	0
						0	177	0.632195	0.374612	0.37467	2.53757	-1.13385	-1.13389	0.676581	177	0.662975	NASH	1
						0	178	0.577602	0.462509	0.462408	2.31844	-1.39989	-1.39942	-0.0741182	178	0.481479	NO NASH	0
						0	179	0.707928	0.370065	0.369996	2.84155	-1.12008	-1.11974	1.00848	179	0.732722	NASH	1
						0	180	0.743051	0.340873	0.340794	2.98254	-1.03173	-1.03137	1.32619	180	0.790209	NASH	1
						0	181	0.636221	0.422792	0.422759	2.55373	-1.27968	-1.27942	0.401379	181	0.599019	NASH	1
						0	182	0.680227	0.389832	0.389766	2.73036	-1.17991	-1.17958	0.777625	182	0.685168	NASH	1
						0	183	0.656168	0.398571	0.398526	2.63379	-1.20636	-1.20609	0.628093	183	0.652057	NASH	1
						0	184	0.484439	0.529654	0.529623	1.94449	-1.60312	-1.60284	-0.854713	184	0.298445	NO NASH	0
						0	185	0.801658	0.229036	0.229034	3.21778	-0.693228	-0.693143	2.23815	185	0.903624	NASH	1
						0	186	0.600085	0.433085	0.433043	2.40868	-1.31083	-1.31055	0.194055	186	0.548362	NASH	1
						0	187	0.53966	0.485513	0.485468	2.16614	-1.46951	-1.46921	-0.365828	187	0.40955	NO NASH	0
						0	188	0.901146	0.15016	0.150151	3.61711	-0.454492	-0.454411	3.11496	188	0.957506	NASH	1
						0	189	0.924384	0.106287	0.106289	3.71039	-0.321703	-0.32167	3.47376	189	0.969932	NASH	1
						0	190	0.949566	0.0833798	0.0833618	3.81147	-0.252368	-0.252284	3.71356	190	0.97619	NASH	1
						0	191	0.825456	0.200585	0.200574	3.3133	-0.607114	-0.60701	2.50592	191	0.924556	NASH	1
						0	192	0.920602	0.126964	0.12695	3.69521	-0.384284	-0.384196	3.33347	192	0.96556	NASH	1
						0	193	0.891849	0.186704	0.186618	3.57979	-0.565101	-0.564775	2.85667	193	0.945662	NASH	1
						0	194	0.676457	0.374781	0.374731	2.71523	-1.13436	-1.13408	0.853546	194	0.701311	NASH	1
						0	195	0.908585	0.17578	0.175725	3.64697	-0.532039	-0.531809	2.98987	195	0.952115	NASH	1
						0	196	0.962052	0.0744505	0.0744409	3.86158	-0.225341	-0.225286	3.8177	196	0.978494	NASH	1
						0	197	0.934425	0.122951	0.122909	3.75069	-0.37214	-0.371967	3.41333	197	0.968119	NASH	1
						0	198	0.89451	0.17165	0.171622	3.59047	-0.519538	-0.51939	2.95829	198	0.950654	NASH	1
						0	199	0.922791	0.1463	0.146232	3.70399	-0.442809	-0.442552	3.22538	199	0.961778	NASH	1
						0	200	0.722455	0.348365	0.348274	2.89987	-1.05441	-1.05401	1.1982	200	0.768205	NASH	1
						0	201	0.95601	0.0723538	0.0723404	3.83733	-0.218995	-0.218929	3.80616	201	0.97825	NASH	1
						0	202	0.979178	0.0471221	0.047109	3.93032	-0.142626	-0.142569	4.05188	202	0.982908	NASH	1
						0	203	0.964337	0.0655517	0.065551	3.87075	-0.198407	-0.198382	3.88071	203	0.979781	NASH	1
						0	204	0.94454	0.0824936	0.0825	3.79129	-0.249685	-0.249676	3.69868	204	0.975842	NASH	1
						0	205	0.890636	0.1823	0.182268	3.57492	-0.551771	-0.551609	2.87829	205	0.946763	NASH	1
						0	206	0.789127	0.284035	0.283949	3.16748	-0.859697	-0.859333	1.8552	206	0.864736	NASH	1
						0	207	0.822648	0.250647	0.250639	3.30203	-0.758639	-0.758527	2.19161	207	0.899494	NASH	1
						0	208	0.87711	0.203468	0.203404	3.52063	-0.615843	-0.615575	2.69597	208	0.936788	NASH	1
						0	209	0.892873	0.135806	0.135816	3.58391	-0.411046	-0.411029	3.16858	209	0.959635	NASH	1
						0	210	0.958943	0.0772515	0.0772348	3.8491	-0.233819	-0.233741	3.78829	210	0.977867	NASH	1
						0	211	0.959998	0.0769905	0.0769827	3.85334	-0.233029	-0.232978	3.79408	211	0.977992	NASH	1
						0	212	0.898175	0.144634	0.144625	3.60519	-0.437768	-0.43769	3.13648	212	0.958373	NASH	1
						0	213	0.79419	0.297878	0.297781	3.1878	-0.901595	-0.901196	1.79176	213	0.857143	NASH	1
						0	214	0.903338	0.16795	0.167889	3.62591	-0.508339	-0.508094	3.01623	214	0.953302	NASH	1
						0	215	0.977164	0.0472744	0.0472647	3.92224	-0.143087	-0.14304	4.04286	215	0.982755	NASH	1
						0	216	0.959185	0.0861118	0.0860773	3.85007	-0.260637	-0.260502	3.73569	216	0.976699	NASH	1
						0	217	0.97743	0.0555366	0.0555039	3.92331	-0.168094	-0.167975	3.99399	217	0.981907	NASH	1
						0	218	0.944308	0.0828639	0.082855	3.79036	-0.250806	-0.25075	3.69555	218	0.975768	NASH	1
						0	219	0.857819	0.209272	0.209223	3.4432	-0.633408	-0.633186	2.58336	219	0.929783	NASH	1
						0	220	0.952811	0.0806217	0.0806259	3.82449	-0.24402	-0.244004	3.74322	220	0.97687	NASH	1
						0	221	0.931186	0.14715	0.147045	3.73769	-0.445382	-0.445011	3.25405	221	0.962818	NASH	1
						0	222	0.818066	0.260143	0.260085	3.28364	-0.78738	-0.787113	2.11589	222	0.892438	NASH	1
						0	223	0.805307	0.265525	0.265448	3.23242	-0.803672	-0.803344	2.03216	223	0.884132	NASH	1
						0	224	0.917762	0.121943	0.12192	3.68381	-0.369086	-0.368975	3.3525	224	0.966186	NASH	1
						0	225	0.885915	0.199241	0.199169	3.55598	-0.603046	-0.602759	2.75692	225	0.940303	NASH	1
						0	226	0.91585	0.151965	0.151917	3.67613	-0.459955	-0.459757	3.16317	226	0.959424	NASH	1
						0	227	0.714627	0.34088	0.340822	2.86844	-1.03175	-1.03145	1.21199	227	0.770651	NASH	1
						0	228	0.903637	0.130978	0.130969	3.62711	-0.396435	-0.396359	3.24106	228	0.962351	NASH	1
						0	229	0.893324	0.180512	0.180468	3.58571	-0.546359	-0.546164	2.89994	229	0.947843	NASH	1
						0	230	0.780114	0.230383	0.230402	3.1313	-0.697305	-0.697281	2.14346	230	0.895057	NASH	1
						0	231	0.90865	0.160321	0.16028	3.64723	-0.485248	-0.485066	3.08367	231	0.956214	NASH	1
						0	232	0.890329	0.174401	0.174353	3.57369	-0.527863	-0.527656	2.92492	232	0.949065	NASH	1
						0	233	0.81574	0.237862	0.237865	3.2743	-0.719944	-0.719866	2.24124	233	0.903892	NASH	1
						0	234	0.915583	0.149077	0.149072	3.67506	-0.451215	-0.451147	3.17945	234	0.960054	NASH	1
						0	235	0.934518	0.112353	0.112333	3.75106	-0.340063	-0.339962	3.47779	235	0.970049	NASH	1
						0	236	0.953975	0.090949	0.0909157	3.82916	-0.275277	-0.275145	3.68549	236	0.975529	NASH	1
						0	237	#NUM!	#NUM!	#NUM!	#NUM!	#NUM!	#NUM!	#NUM!	237	#NUM!	#NUM!	#NUM!
						0	238	0.976779	0.05493	0.0548983	3.92069	-0.166258	-0.166143	3.99504	238	0.981926	NASH	1
						0	239	0.983534	0.0490155	0.0489711	3.94781	-0.148356	-0.148205	4.058	239	0.98301	NASH	1
						0	240	0.993074	0.0238714	0.0238584	3.9861	-0.0722522	-0.0722045	4.2484	240	0.985914	NASH	1
						0	241	0.994206	0.0157463	0.0157422	3.99065	-0.0476598	-0.0476418	4.30209	241	0.986641	NASH	1
						0	242	0.971272	0.0660678	0.0660429	3.89859	-0.199969	-0.19987	3.9055	242	0.980266	NASH	1
						0	243	0.97928	0.0581737	0.0581299	3.93074	-0.176076	-0.175923	3.98549	243	0.981756	NASH	1
						0	244	0.985125	0.0325444	0.0325323	3.9542	-0.0985028	-0.0984549	4.16399	244	0.984693	NASH	1
						0	245	0.983206	0.045466	0.0454424	3.94649	-0.137613	-0.137526	4.0781	245	0.983343	NASH	1
						0	246	0.960796	0.078949	0.0789368	3.85654	-0.238957	-0.238892	3.78544	246	0.977805	NASH	1
						0	247	0.983237	0.0364503	0.0364428	3.94662	-0.110325	-0.110289	4.13275	247	0.984214	NASH	1
						0	248	0.978541	0.0585325	0.0584925	3.92777	-0.177162	-0.17702	3.98033	248	0.981663	NASH	1
						0	249	0.996182	0.0158436	0.0158352	3.99858	-0.047954	-0.0479233	4.30945	249	0.986737	NASH	1
						0	250	0.998881	0.00456446	0.00456301	4.00941	-0.0138154	-0.0138094	4.38854	250	0.987733	NASH	1
